# Supplementary material for: Atmospheric mercury in the Southern Hemisphere – Part 1: Trend and inter-annual variations in atmospheric mercury at Cape Point, South Africa, in 2007–2017, and on Amsterdam Island in 2012–2017
Source: Copernicus journal article supplement (doi:10.5194/acp-20-7683-2020), 2020-07-02
Supplement: Supplementary file 1 [file acp-20-7683-2020-supplement.pdf]

Supplement of Atmos. Chem. Phys., 20, 7683–7692, 2020  
<https://doi.org/10.5194/acp-20-7683-2020-supplement>  
© Author(s) 2020. This work is distributed under  
the Creative Commons Attribution 4.0 License.

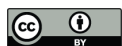

Atmospheric  
Chemistry  
and Physics  
Open Access  
EGU

*Supplement of*

**Atmospheric mercury in the Southern Hemisphere – Part 1: Trend and inter-annual variations in atmospheric mercury at Cape Point, South Africa, in 2007–2017, and on Amsterdam Island in 2012–2017**

**Franz Slemr et al.**

*Correspondence to:* Franz Slemr ([franz.slemr@mpic.de](mailto:franz.slemr@mpic.de)) and Lynwill Martin ([lynwill.martin@weathersa.co.za](mailto:lynwill.martin@weathersa.co.za))

The copyright of individual parts of the supplement might differ from the CC BY 4.0 License.

1 **Supporting information**

2 *Table SI1: Trends at Cape Point for the 2007 – 2014 period.*

| Species         | Monthly | Annual slope   | Unit                                 | R, n, significance |
|-----------------|---------|----------------|--------------------------------------|--------------------|
| GEM             | average | 16.91 ± 3.60   | pg m <sup>-3</sup> yr <sup>-1</sup>  | 0.4436, 92, >99.9% |
|                 | median  | 16.18 ± 3.61   |                                      | 0.4273, 92, >99.9% |
| CO <sub>2</sub> | average | 2.072 ± 0.025  | ppm yr <sup>-1</sup>                 | 0.9932, 96, >99.9% |
|                 | median  | 2.080 ± 0.020  |                                      | 0.9953, 96, >99.9% |
| Rn              | average | -7.91 ± 12.76  | mBq m <sup>-3</sup> yr <sup>-1</sup> | -0.0641, 95, ns    |
|                 | median  | -6.77 ± 7.03   |                                      | -0.0994, 95, ns    |
| CO              | average | -1.152 ± 0.500 | ppb yr <sup>-1</sup>                 | -0.2313, 96, >95%  |
|                 | median  | -0.500 ± 0.356 |                                      | -0.1434, 96, ns    |
| CH <sub>4</sub> | average | 5.698 ± 0.659  | ppb yr <sup>-1</sup>                 | 0.6655, 96, >99.9% |
|                 | median  | 5.849 ± 0.534  |                                      | 0.7490, 96, >99.9% |
| O <sub>3</sub>  | average | 0.157 ± 0.236  | ppb yr <sup>-1</sup>                 | 0.0685, 96, ns     |
|                 | median  | 0.152 ± 0.253  |                                      | 0.0620, 96, ns     |

3

4

5  
6  
7

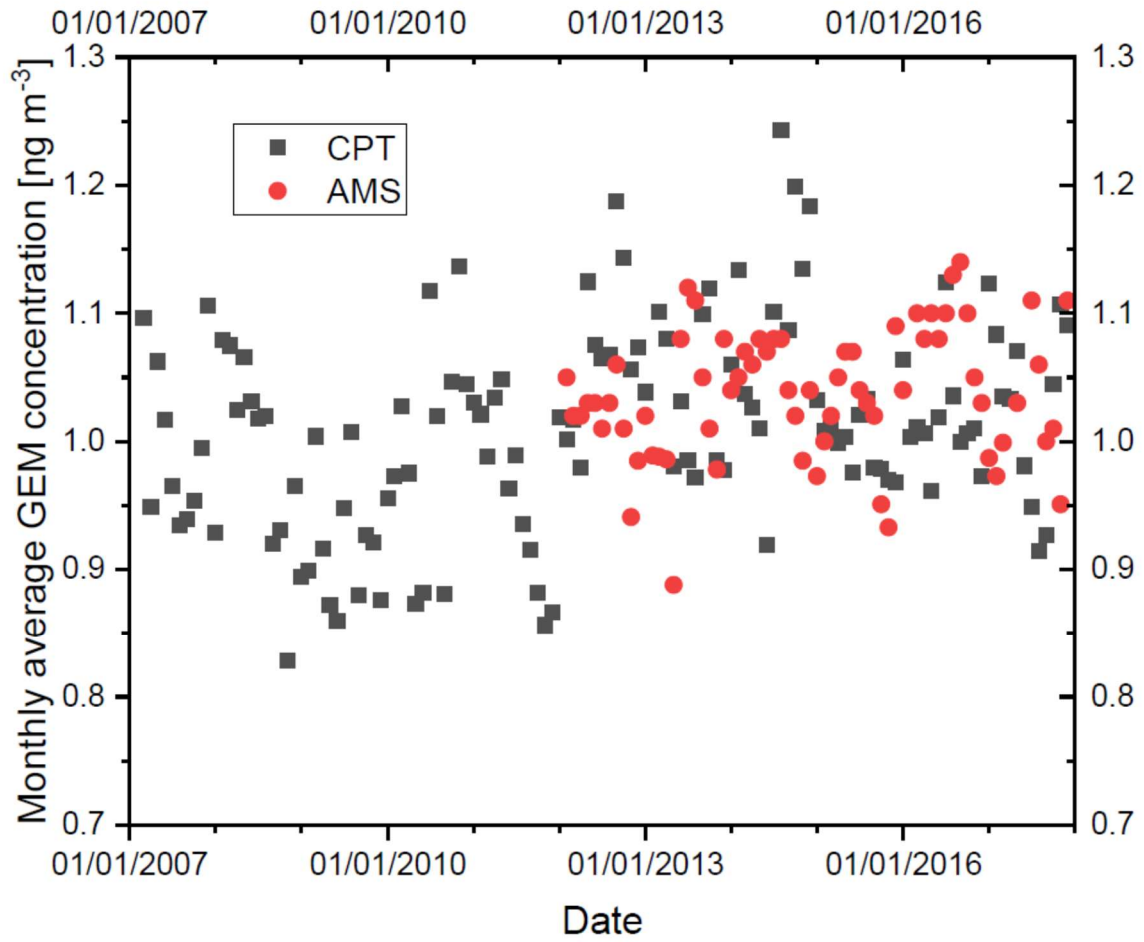

8

9 Figure S11: Monthly median GEM concentrations at Cape Point (CPT) since March 2007 until December  
10 2017 and at Amsterdam Island (AMS) since February 2012 until December 2017. Months with data  
11 coverage of less than 10% were not considered.
